# Supplementary material for: Analysis of five novel putative constitutive gene promoters in transgenic rice plants
Source: PubMed Central journal article supplement — J Exp Bot. 2010 Apr 2;61(9):2459–67. doi: 10.1093/jxb/erq076 (PMC2877896; doi:10.1093/jxb/erq076), 2010-04-02
Supplement: erq076_1.pdf [file erq076_1.pdf]

# **Analysis of five novel putative constitutive gene promoters in transgenic rice plants**

*Su-Hyun Park, Nari Yi, Youn Shic Kim, Min-Ho Jeong, Seung-Woon Bang, Yang Do Choi, and Ju-Kon Kim*

## **Supplementary Materials**

Supplementary data are available at *JXB* online.

**Supplementary Table S1.** Microarray data for seven constitutive rice genes in 14-day old leaves and roots and early stage flowers.

**Supplementary Table S2.** Primers used in this study for RT-PCR and promoter isolation.

**Supplementary Fig. S1.** Structure of the *SCPI* 5' UTR.

**Supplementary Fig. S2.** Potential regulatory elements in the promoter regions of the eight constitutive genes analyzed in this study.

**Supplementary Table S1.** Microarray data for seven constitutive rice genes in 14-day old leaves and roots and early stage flowers.

| Gene                | Accession No. <sup>a</sup> | Intensity <sup>b</sup> |         |         |         |         |         |
|---------------------|----------------------------|------------------------|---------|---------|---------|---------|---------|
|                     |                            | Leaf                   |         | Root    |         | Flower  |         |
|                     |                            | repeat1                | repeat2 | repeat1 | repeat2 | repeat1 | repeat2 |
| <b><i>APX</i></b>   | <b>AK068430</b>            | 30,785                 | 34,118  | 34,445  | 36,445  | 44,140  | 41,005  |
| <b><i>SCP1</i></b>  | <b>AK101133</b>            | 30,168                 | 30,313  | 51,879  | 56,893  | 32,864  | 36,316  |
| <b><i>PGD1</i></b>  | <b>AK065920</b>            | 20,716                 | 23,222  | 43,532  | 50,458  | 32,756  | 33,151  |
| <b><i>R1G1B</i></b> | <b>AF503583</b>            | 24,641                 | 34,470  | 48,095  | 49,468  | 8,990   | 8,760   |
| <b><i>EIF5</i></b>  | <b>AK060387</b>            | 25,468                 | 23,663  | 42,139  | 39,806  | 37,727  | 42,025  |
| <b><i>OsCc1</i></b> | <b>AK060267</b>            | 20,643                 | 20,252  | 34,386  | 33,154  | 25,736  | 24,631  |
| <b><i>Act1</i></b>  | <b>AK100267</b>            | 24,925                 | 29,283  | 50,056  | 42,771  | 41,418  | 40,581  |

<sup>a</sup>Accession numbers for full-length cDNA sequences of the corresponding genes. <sup>b</sup>Numbers represent the spot intensity values from microarray analysis of two independent biological replicates.

**Supplementary Table S2.** Primers used in this study for RT-PCR and promoter isolation

| Gene          | Specificity | Accession No. <sup>a</sup> | Product Size (bp) | Primer Sequence               |                               |
|---------------|-------------|----------------------------|-------------------|-------------------------------|-------------------------------|
|               |             |                            |                   | Forward                       | Reverse                       |
| <i>APX</i>    | gene        | AK068430                   | 237               | 5'- GACCTCTAGACCGCCGTATT -3'  | 5'- GCCAACCACCTCGCAATCCAA -3' |
| <i>SCP1</i>   | gene        | AK101133                   | 240               | 5'- TCGCTGCCTACGCCAACATC -3'  | 5'- TCGCCGAACTAGCAGGTGAG -3'  |
| <i>PGD1</i>   | gene        | AK065920                   | 238               | 5'- CGGTGAGCTAGCGAGGATCT -3'  | 5'- CCGGTAGGAGTCGAAGTACG -3'  |
| <i>R1G1B</i>  | gene        | AF503583                   | 250               | 5'- CTTCTCGATTGCCGTGTGCT -3'  | 5'- GCAAGTCTCAAGCTCTCAAT -3'  |
| <i>EIF5</i>   | gene        | AK060387                   | 168               | 5'- GATCTGCGCTCTGAAGGATA -3'  | 5'- AACCGCAAGATGGAACAACG -3'  |
| <i>OsCc1</i>  | gene        | AK060267                   | 127               | 5'- ACTCTACGGCCAACAAGAAC -3'  | 5'- CTCCTGTGGCTTCTTCAACC -3'  |
| <i>Act1</i>   | gene        | AK100267                   | 124               | 5'- ATGGTGTGACCCACACTGTC -3'  | 5'- TAACCACGCTCCGTCAGGAT -3'  |
| <i>OsUbi1</i> | gene        | AK121590                   | 187               | 5'- ATGGAGCTGCTGCTGTTCTA -3'  | 5'- TTCTTCCATGCTGCTCTACC -3'  |
| <i>gfp</i>    | gene        | CS478164                   | 141               | 5'- CAGCACGACTTCTTCAAGTCC -3' | 5'- CTTCAGCTCGATGCGGTTTCC -3' |
| <i>APX</i>    | promoter    | AK068430                   | 1673              | 5'- GTAAGGTGACATGGCATATC -3'  | 5'- CCAATCCGAATCAATCAATC -3'  |
| <i>SCP1</i>   | promoter    | AK101133                   | 1853              | 5'- TTGACTTTTTTCTGCGAAGAA -3' | 5'- TAACTCTTGCCGAAAAGAA -3'   |
| <i>PGD1</i>   | promoter    | AK065920                   | 1891              | 5'- TAGATATGCCGAACATGACC -3'  | 5'- GCAGATAGATGCACCAAATG -3'  |
| <i>R1G1B</i>  | promoter    | AF503583                   | 1799              | 5'- ATAGCTGTTGTACTGATGTC -3'  | 5'- TCTCTCGCAGTATTACCAAC -3'  |
| <i>EIF5</i>   | promoter    | AK060387                   | 1837              | 5'- TTGTTCCACCTCATCATTAA -3'  | 5'- CAACCTGCCACCAACAACAA -3'  |
| <i>OsCc1</i>  | promoter    | AK060267                   | 1882              | 5'- TCGAAGGTAGGCTGCAGTTCT -3' | 5'- CCCGGGGGAGCCTCCGAGAA -3'  |
| <i>Act1</i>   | promoter    | AK100267                   | 1263              | 5'- AGCTAGCATACTCGAGGTCAT -3' | 5'- TATCCTCGGCGTCAGCCATC -3'  |
| <i>ZmUbi1</i> | promoter    | DQ141598                   | 1973              | 5'- CGGTCGTGCCCTCTCTAGA -3'   | 5'- CTGCAGAAGTAACACCAAACA -3' |

Forward and reverse primers for promoter isolation have additional 12mers, AAAAAGCAGGCT and AGAAAGCTGGGT, at their 5'-ends, respectively. The first PCR products for promoters were re-amplified for cloning with the adaptor primers attB1 5'-GGGGACAAGTTTGTACAAAAAAGCAGGCT-3' and attB2 5'-GGGGACCACTTTGTACAAGAAAGCTGGGT-3'.



**Fig. S2**

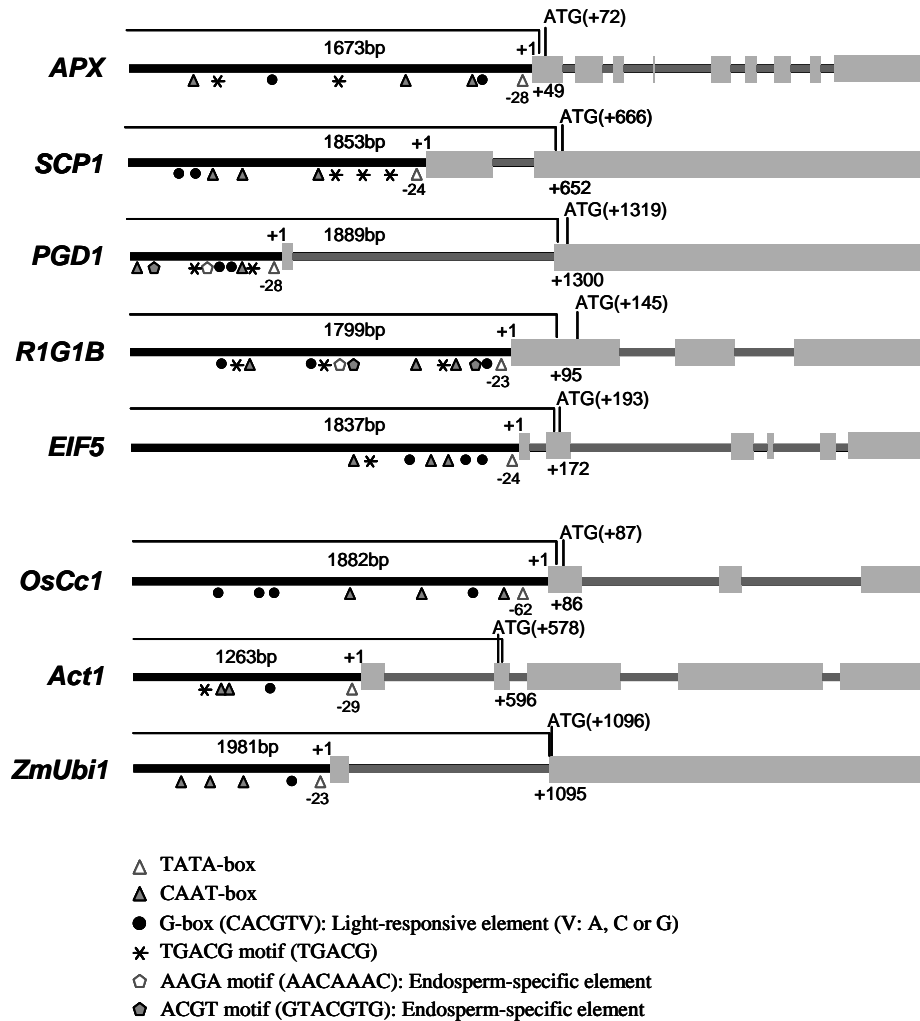

**Supplementary Fig. S2.** Potential regulatory elements in the promoter regions of the eight constitutive genes analyzed in this study. The TATA and CAAT sequences are indicated by white and grey triangles, respectively. The TATA start positions are marked below each white triangle. G-box, filled circle; TGACG, star; AAGA and ACGT motif, white and grey pentagon, respectively. Bold lines, 5' upstream promoter region; filled boxes, exons; lines between the boxes, introns. The lengths of all boxes were drawn to scale. The transcriptional start site and the translational start codon are denoted by +1 and ATG, respectively.
